# Supplementary material for: Single-Use Fluidic Electrochemical Paper-Based Analytical Devices Fabricated by Pen Plotting and Screen-Printing for On-Site Rapid Voltammetric Monitoring of Pb(II) and Cd(II)
Source: MDPI journal article supplement (doi:10.3390/s21206908), 2021-10-18
Supplement: s1 [file s1]

## Supplementary Material

**Single-use fluidic electrochemical paper-based analytical devices fabricated by pen plotting and screen-printing for on-site rapid voltammetric monitoring of Pb(II) and Cd(II)**

*Dionysios Soulis<sup>1</sup>, Maria Trachioti<sup>2</sup>, Anastasios Economou<sup>1,\*</sup>, Christos Kokkinos, Mamas Prodrromidis*

<sup>1</sup> Department of Chemistry, National and Kapodistrian University of Athens, Athens, 157 71, Greece

<sup>2</sup> Department of Chemistry, University of Ioannina, Ioannina, 45 110, Greece

\* e-mail: [aeconomou@chem.uoa.gr](mailto:aeconomou@chem.uoa.gr); fax: +30 210 7274750; tel: +30 210 7274298

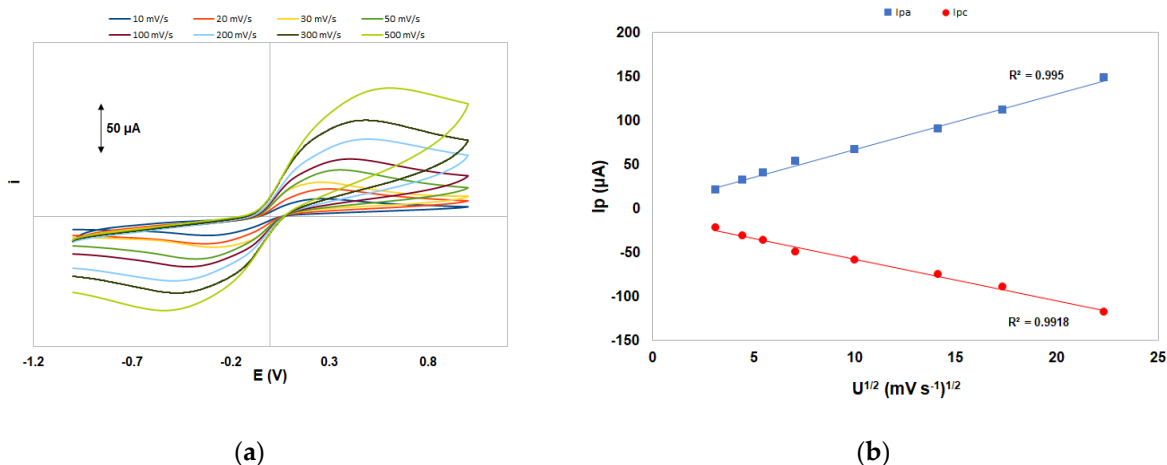

Figure S1. (a) CVs at the ePADs in 0.002 mol L<sup>-1</sup> potassium ferrocyanide/ 0.002 mol L<sup>-1</sup> potassium ferricyanide solution in 0.01 mol L<sup>-1</sup> KCl, (b) Plot of the anodic peak current ( $I_{pa}$ ) and the cathodic peak current ( $I_{pc}$ ) vs the scan rate ( $U$ ).

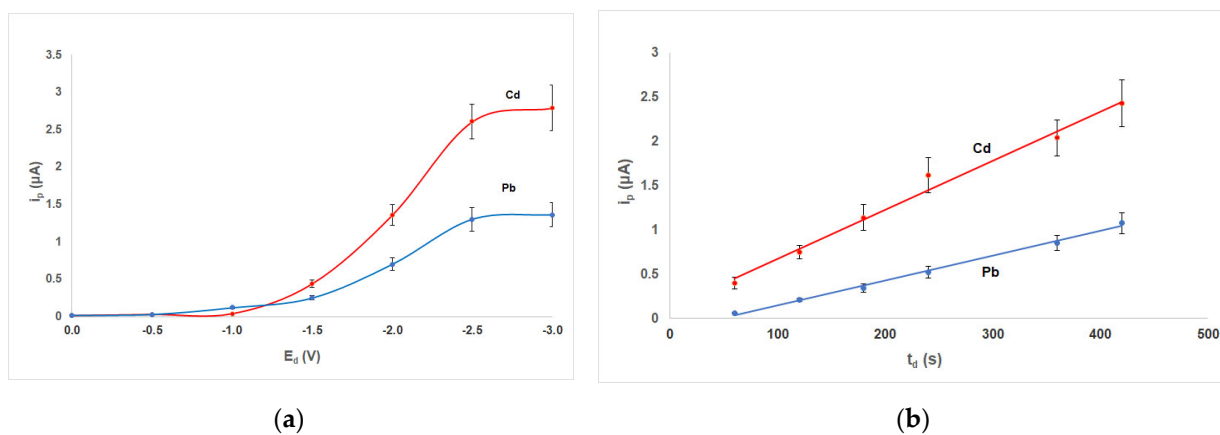

Figure S2. Effect of the (a) deposition potential, (b) deposition time on the stripping peak heights of Pb and Cd. Conditions: 200  $\mu$ g L<sup>-1</sup> Pb(II) and Cd(II); supporting electrolyte 0.5 mol L<sup>-1</sup> acetate buffer (pH 4.5) containing 10 mg L<sup>-1</sup> Bi(III); deposition time, 420 s; deposition potential -2.5 V.

Table S1. Comparison of existing electrochemical paper-based devices for the determination of Pb(II) and Cd(II) by stripping analysis (in grayscale are the applications dealing with simultaneous determination of the two target metals).

| Type of Device | LOD ( $\mu\text{g L}^{-1}$ ) |                   | Linear range ( $\mu\text{g L}^{-1}$ ) |                         | Ref.      |
|----------------|------------------------------|-------------------|---------------------------------------|-------------------------|-----------|
|                | Pb(II)                       | Cd(II)            | Pb(II)                                | Cd(II)                  |           |
| Non-integrated | 700 <sup>1</sup>             | 1000 <sup>1</sup> | 1000-10000 <sup>1</sup>               | 2500-10000 <sup>1</sup> | 41        |
|                | 100 <sup>2</sup>             | 400 <sup>2</sup>  | 500-10000 <sup>2</sup>                | 500-10000 <sup>2</sup>  |           |
| Non-integrated | 1                            | 5                 | NR                                    | NR                      | 36        |
| Non-integrated | 2                            | -                 | NR                                    | NR                      | 37        |
| Non-integrated | 1                            | 2.4               | NR                                    | NR                      | 42        |
| Non-integrated | 0.5                          | 0.5               | 0.5-400                               | 0.5-400                 | 43        |
| Integrated     | 0.5                          | -                 | 10-250                                | -                       | 44        |
| Integrated     | 4.2                          | 2.4               | 10-1000                               | 5-800                   | This work |

<sup>1</sup> Bismuth-film

<sup>2</sup> Mercury-film

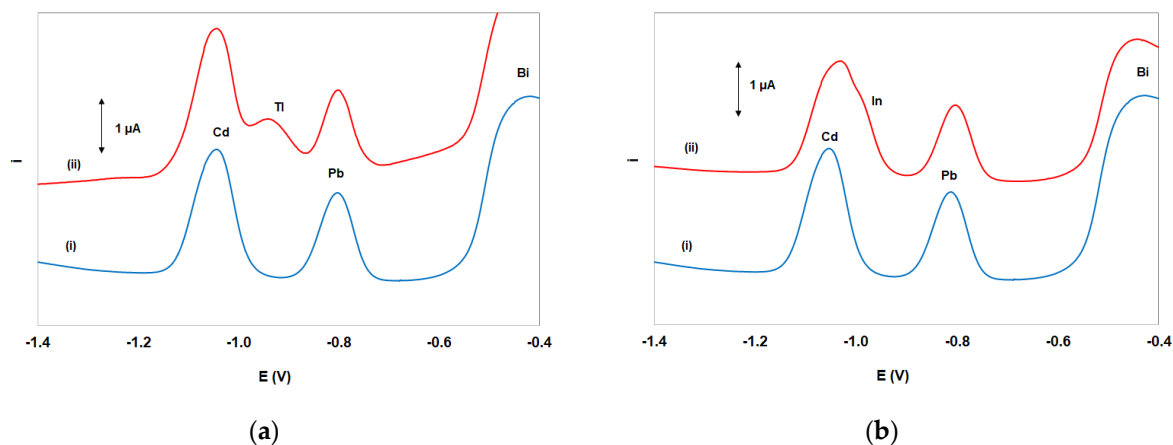

Figure S3. Interference by (a) Tl(I), (b) In(III) on the SW stripping peaks of Pb and Cd. (i) Response without interferences, (ii) Response in the presence of interferences. Conditions: 200  $\mu\text{g L}^{-1}$  Pb(II), Cd(II), In(III) and Tl(I); supporting electrolyte 0.5 mol  $\text{L}^{-1}$  acetate buffer (pH 4.5) containing 10 mg  $\text{L}^{-1}$  Bi(III); deposition time, 420 s; deposition potential -2.5 V.
